# Supplementary material for: A Systematic Review and Meta-analysis of Randomized Control Trials: Combination Treatment With Proton Pump Inhibitor Plus Prokinetic for Gastroesophageal Reflux Disease
Source: PubMed Central journal article supplement — J Neurogastroenterol Motil. 2021 Apr 30;27(2):165–75. doi: 10.5056/jnm20161 (PMC8026378; doi:10.5056/jnm20161), 2021-04-30
Supplement: jnm-27-2-165-supple.pdf [file jnm-27-2-165-supple.pdf]

|                     | Random sequence generation (selection bias) | Allocation concealment (selection bias) | Blinding of participants and personnel (performance bias) | Blinding of outcome assessment (detection bias) | Incomplete outcome data (attrition bias) | Selective reporting (reporting bias) | Other bias |
|---------------------|---------------------------------------------|-----------------------------------------|-----------------------------------------------------------|-------------------------------------------------|------------------------------------------|--------------------------------------|------------|
| Cho 2013            | ⊕                                           | ⊕                                       | ⊕                                                         | ⊕                                               | ⊕                                        | ⊕                                    | ⊕          |
| Hsu 2010            | ⊕                                           | ⊕                                       | ⊕                                                         | ⊕                                               | ⊕                                        | ⊕                                    | ⊕          |
| Lee 2017            | ⊕                                           | ⊕                                       | ⊕                                                         | ⊕                                               | ⊕                                        | ⊕                                    | ⊕          |
| Lim 2013            | ⊕                                           | ⊕                                       | ⊕                                                         | ⊕                                               | ⊕                                        | ⊕                                    | ⊕          |
| Madan 2004          | ⊕                                           | ⊕                                       | ⊕                                                         | ⊕                                               | ⊕                                        | ⊕                                    | ⊕          |
| Marakhouki 2017     | ⊕                                           | ⊕                                       | ⊕                                                         | ⊕                                               | ⊕                                        | ⊕                                    | ⊕          |
| Miwa 2011           | ⊕                                           | ⊕                                       | ⊕                                                         | ⊕                                               | ⊕                                        | ⊕                                    | ⊕          |
| Ndraha 2011         | ⊕                                           | ⊕                                       | ⊕                                                         | ⊕                                               | ⊕                                        | ⊕                                    | ⊕          |
| Puranik 2018        | ⊕                                           | ⊕                                       | ⊕                                                         | ⊕                                               | ⊕                                        | ⊕                                    | ⊕          |
| Shaheen 2015        | ⊕                                           | ⊕                                       | ⊕                                                         | ⊕                                               | ⊕                                        | ⊕                                    | ⊕          |
| Sirinawasatien 2019 | ⊕                                           | ⊕                                       | ⊕                                                         | ⊕                                               | ⊕                                        | ⊕                                    | ⊕          |
| Tack 2015           | ⊕                                           | ⊕                                       | ⊕                                                         | ⊕                                               | ⊕                                        | ⊕                                    | ⊕          |
| Wang 2014           | ⊕                                           | ⊕                                       | ⊕                                                         | ⊕                                               | ⊕                                        | ⊕                                    | ⊕          |
| Xiao 2019           | ⊕                                           | ⊕                                       | ⊕                                                         | ⊕                                               | ⊕                                        | ⊕                                    | ⊕          |
| Yamaji 2014         | ⊕                                           | ⊕                                       | ⊕                                                         | ⊕                                               | ⊕                                        | ⊕                                    | ⊕          |
| Yamashita 2019      | ⊕                                           | ⊕                                       | ⊕                                                         | ⊕                                               | ⊕                                        | ⊕                                    | ⊕          |

Supplementary Figure 1. Risk of bias of the enrolled studies.

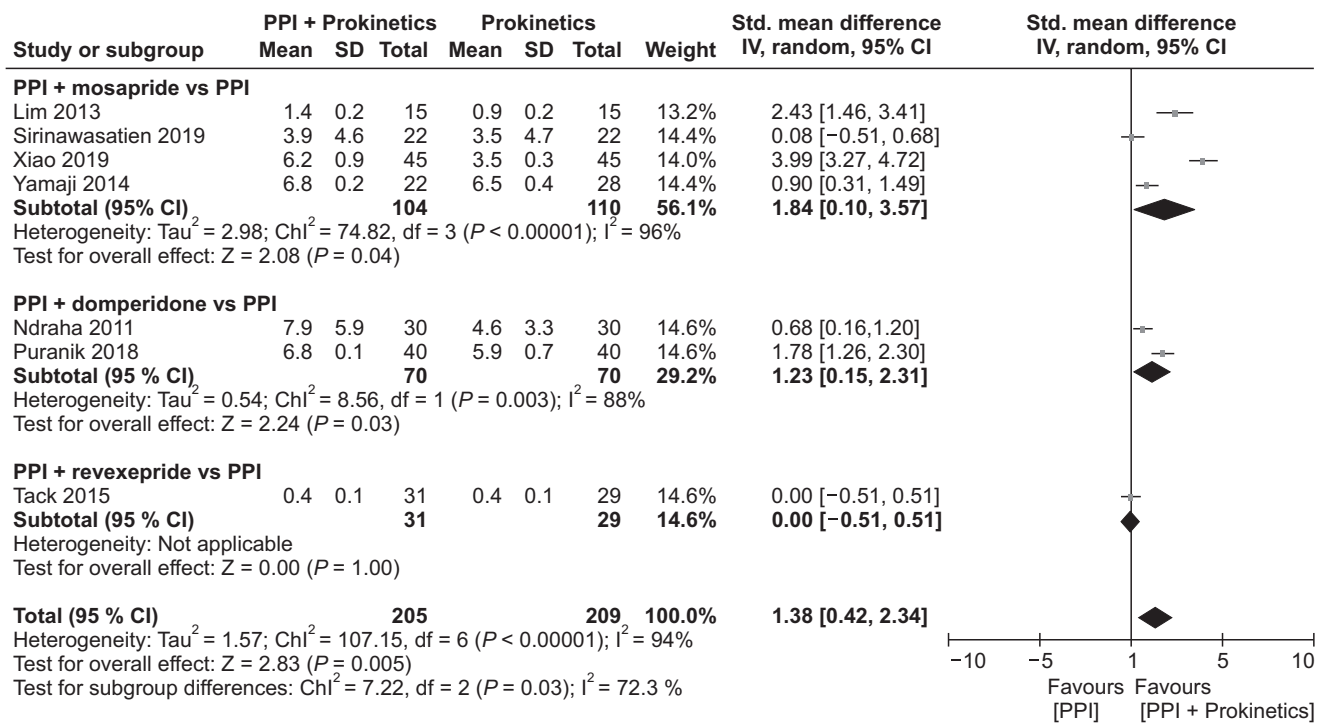

**Supplementary Figure 2.** Forest plot comparing proton pump inhibitor (PPI) plus prokinetics and PPI monotherapy in patients with gastro-esophageal reflux disease in term of symptom improvement, subgrouped by individual prokinetic.

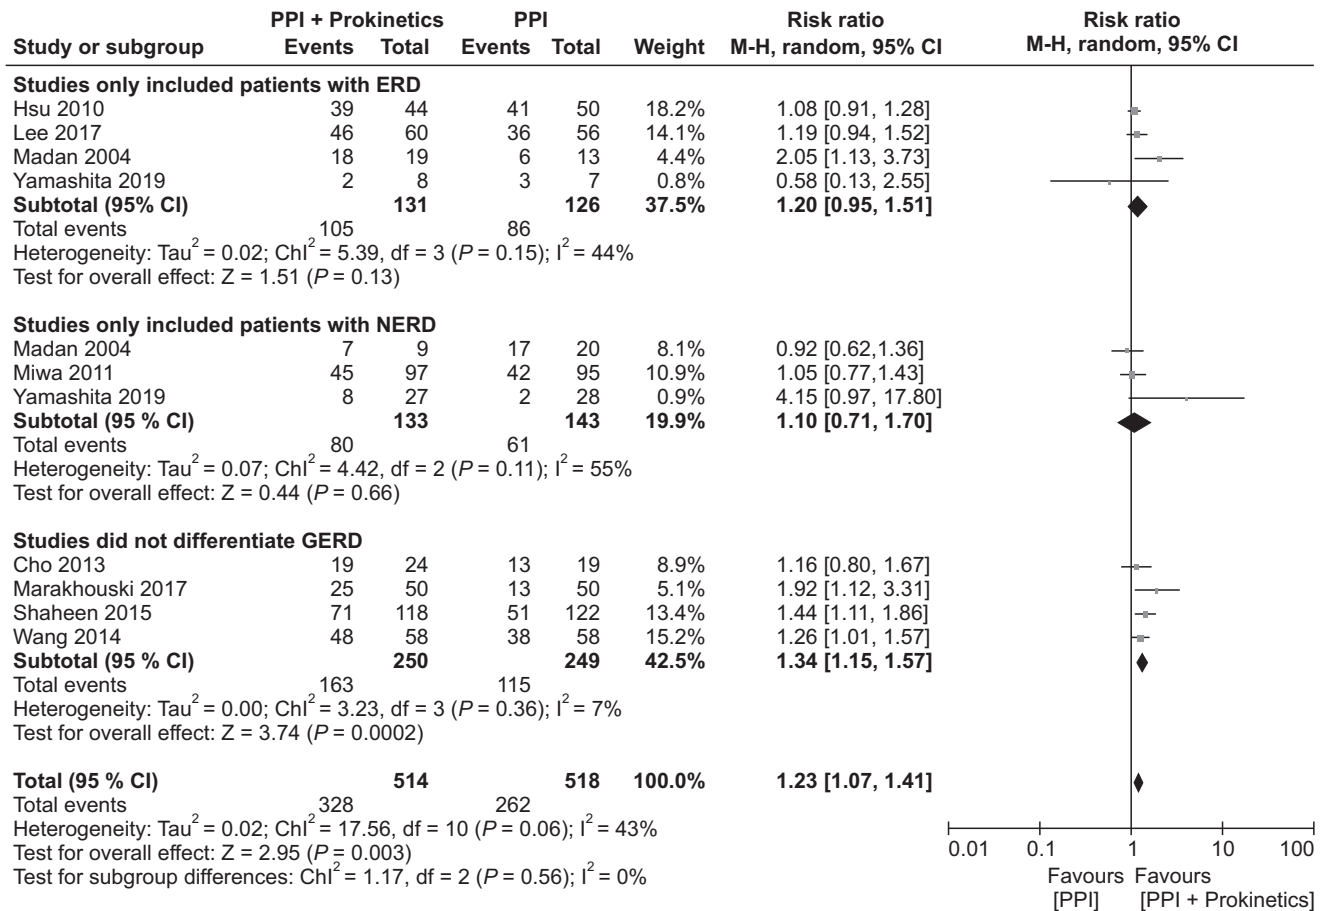

**Supplementary Figure 3.** Forest plot comparing proton pump inhibitor (PPI) plus prokinetics and PPI monotherapy in patients with gastroesophageal reflux disease in term of symptom improvement, subgrouped by gastroesophageal reflux disease subtype.

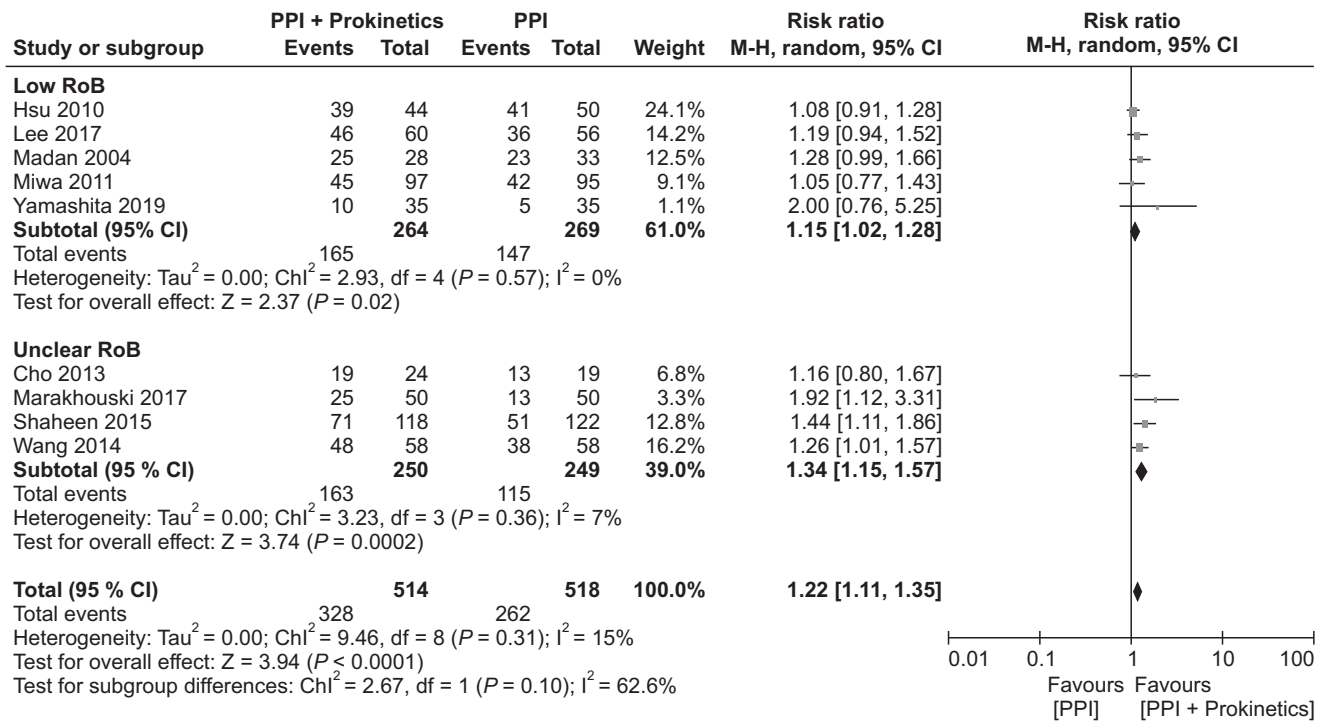

**Supplementary Figure 4.** Forest plot comparing proton pump inhibitor (PPI) plus prokinetics and PPI monotherapy in patients with gastro-esophageal reflux disease in term of symptom improvement, subgrouped by risk of bias.
